# Supplementary material for: Lyophilized Maqui (Aristotelia chilensis) Berry Induces Browning in the Subcutaneous White Adipose Tissue and Ameliorates the Insulin Resistance in High Fat Diet-Induced Obese Mice
Source: PubMed Central journal article supplement (PMC6769892; doi:10.3390/antiox8090360), 2019-09-01
Supplement: antioxidants-08-00360-s001.pdf [file antioxidants-08-00360-s001.pdf]

**Table S1:** Nutritional composition of the lyophilized maqui

|                           | <b>100g</b>   | <b>Per serving (2g)</b> |
|---------------------------|---------------|-------------------------|
| <b>Calories</b>           | 914kJ/232Kcal | 19.7kJ/4.64Kcal         |
| <b>Total Fat</b>          | 10.8g         | 0.2g                    |
| <b>Total Carbohydrate</b> | 78g           | 1.6g                    |
| Sugars                    | 24.2g         | 0.5g                    |
| Dietary fiber             | 50.4g         | 1.0g                    |
| <b>Total Protein</b>      | 6.2g          | 0.1g                    |
| <b>Sodium</b>             | 20.1mg        | 0.4mg                   |
| <b>Polyphenols</b>        | 6550 mg (GAE) | 131 (GAE)               |

**Table S2:** Sequences of the primers used in SYBR Green assays and references of the probes used in Taqman assays.

| Gene         | Forward                          | Reverse                          |
|--------------|----------------------------------|----------------------------------|
| 18s          | 4310893E – 1510059 (Taqman)      |                                  |
| mFgf21       | Mm0840165_g1 (Taqman)            |                                  |
| mB2M         | F-5'-ACTGATACATACGCCTGCAGAGTT-3' | R-5'-TCACATGTCTCGATCCCAGTAGA-3'  |
| mAcox3       | F-5'-GCCTCCTTCAACTCTGGGG-3'      | R-5'-TCAGTTCTTCGTAGCTTCTCTAGG-3' |
| mEhhadh      | F-5'-AATACAGCGATACCAGAAGCC-3'    | R-5'-ATTCCCAGCATCACTTCCG-3'      |
| mGlut4       | F-5'-GTGACTGGAACACTGGTCCTA-3'    | R-5'-CCAGCCAGTTGCATTGTAG-3'      |
| mAcly        | F-5'-GCCAGCGGGAGCACATC-3'        | R-5'-CTTTGAGGTGCCACTTCATC-3'     |
| mGlyK        | F-5'-TGGCAGCCGCGAAGAA-3'         | R-5'-TGATGACTAAGAAGTTCAGCTGTT-3' |
| mAcaca       | F-5'-TGTACAAGCAGTGTGGGCTGGCT-3'  | R-5'-CCACATGGCCTGGCTTGGAGGG-3'   |
| mFasn        | F-5'-GCTGCGGAAACTTCAGGAAAT-3'    | R-5'-AGAGACGTGTCACTCCTGGACTT-3'  |
| mChrebpb     | F-5'-TCTGCAGATCGGTGGAG-3'        | R-5'-CTTGTCCCGGCATAGCAAC-3'      |
| mChrebpa     | F-5'-CGACACTCACCCACCTCTTC-3'     | R-5'-TTGTTTCAGCCGGATCTTGTC-3'    |
| mUcp1        | F-5'-CCCCTGGACTGACC-3'           | R-5'-ACCTAATGGTACTGGAAGCCTGG-3'  |
| mPrdm16      | F-5'-CAGCACGGTGAAGCCATT-3'       | R-5'-GCGTGCATCCGCTTGTG-3'        |
| mPgc1a       | F-5'-AACCACACCCACAGGATCAGA-3'    | R-5'-CTCTTCGCTTTATTGCTCCATGA-3'  |
| mPparg       | F-5'-GCATCAGGCTTCCACTATGGA-3'    | R-5'-AATCGGATGGTTCTTCGGAAA-3'    |
| mDio2        | F-5'-TGCGCTGTGTCTGGAACAG-3'      | R-5'-CTGGAATTGGGAGCATCTTCA-3'    |
| mFsp27b      | F-5'-GTGACCACAGCTTGGGTCCGA-3'    | R-5'-GGGTCTCCCGCTGGGCTTA-3'      |
| mFsp27a      | F-5'-GCCACGCGGTATTGCCAGGA-3'     | R-5'-GGGTCTCCCGCTGGGCTTA-3'      |
| mDgat1       | F-5'-CGACGGCTACTGGGATCTGA-3'     | R-5'-CTCAGGATCAGCATCACCA-3'      |
| mSrebp1c     | F-5'-GGAGCCATGGATTGCACATT-3'     | R-5'-GGCCCGGAAGTCACTGT-3'        |
| mCreg1       | F-5'-CCGTATCTGGTCTTGGACT-3'      | R-5'-CATGAGCCTCCGAAGACACT-3'     |
| mKlb         | F-5'-ACACTGTGGGACACAACCTG-3'     | R-5'-ATCCAATGGACCCCAAGGT-3'      |
| mFgfR1       | F-5'-CTGGCAGCGATACCACCTAC-3'     | R-5'-CTGGGGATGTCCAGTAGGGA-3'     |
| mFgfR4       | F-5'-CTGCTTTGGGCAAGTGGTTC-3'     | R-5'-TGCCAAATCCTTGTCCGAGG-3'     |
| mEgr1        | F-5'-GCCGAGCGAACAACCCTAT-3'      | R-5'-ATAACTCGTCTCCACCCATCGC-3'   |
| mAdiponectin | F-5'-CAGTGGATCTGACGACACCAA-3'    | R-5'-TGGGCAGGATTAAGAGGAACA-3'    |
